# Supplementary material
Source: publisher figshare collection journal article supplement (https://gsajournals.figshare.com/articles/dataset/_/15183750)
Supplement: Supplementary file 1 [file 1]

## Supplementary Tables

**Supplementary Table S1.** Summary of QTL mapping studies for bioenergy traits involving sweet sorghum.

| Reference                                                        | Population/Parents <sup>1</sup>      | Population size and generation                                   | Number of trials (trial names) | Number of markers (technology <sup>2</sup> ) | Number of groups (total length, in cM) | QTL mapping <sup>3</sup> (software) |
|------------------------------------------------------------------|--------------------------------------|------------------------------------------------------------------|--------------------------------|----------------------------------------------|----------------------------------------|-------------------------------------|
| Murray <i>et al.</i> (2008a, 2008b)                              | Rio (S) × BTx623 (G)                 | 176 F <sub>4:5</sub>                                             | 3 (WE05, CS05, CS06)           | 259 (SSR, AFLP)                              | 10 (1,836.0)                           | SMA, IM and CIM (WinQTLCart)        |
| Ritter <i>et al.</i> (2008)                                      | R9188 (S) × R9403463-2-1 (G)         | 184 F <sub>6</sub>                                               | 2 (RB1-2)                      | 228 (AFLP, SSR)                              | 16 (2,012.9)                           | SMA, CIM (WinQTLCart)               |
| Murray <i>et al.</i> (2009)                                      | Diverse panel                        | 125 lines                                                        | 3 (CS06, CS07, ITH07)          | 469 (SSR, SNP)                               | -                                      | GWAS (TASSEL)                       |
| Shiringani <i>et al.</i> (2010) and Shiringani and Friedt (2011) | M71 (G) × SS79 (S)                   | 188 F <sub>5:6</sub>                                             | 4 (GG1-2, RH1-2)               | 157 (AFLP, SSR, EST-SSR)                     | 11 (1,028.3)                           | CIM (PLABQTL)                       |
| Guan <i>et al.</i> (2011)                                        | Shihong137 (G) × L-Tian (S)          | 186 F <sub>2</sub> , 186 F <sub>2:3</sub>                        | 4 (E1-4)                       | 118 (SSR)                                    | 15 (1,884.6)                           | CIM (WinQTLCart)                    |
| Felderhoff <i>et al.</i> (2012)                                  | Rio (S) × BTx623 (G)                 | 185 F <sub>3:4</sub>                                             | 4 (CS09.1, CS09.2, CS10, WE10) | 381 (SNP)                                    | 10 (3,359.0)                           | SMA, IM, CIM (WinQTLCart)           |
| Lv <i>et al.</i> (2013)                                          | Diverse panel (43 S + 76 G)          | 119 lines                                                        | 4 (S10-11, H10-11)             | 51 (SSR)                                     | -                                      | GWAS (TASSEL)                       |
| Burks <i>et al.</i> (2015)                                       | Diverse panel                        | 252 lines                                                        | 3 (13EF, 14EF, 13 DS)          | 42,926 (SNP)                                 | -                                      | GWAS (GAPIT)                        |
| Harris-Shultz <i>et al.</i> (2015)                               | Honey Drip (S) × Collier (S)         | 130 F <sub>2</sub> (map), 92 F <sub>2</sub> (QTL)                | 1 greenhouse trial             | 4,547 polymorphic, 353 mapped (SNP)          | 19 (not available)                     | SMA, CIM (JMP Genomics)             |
| Mocoeur <i>et al.</i> (2015)                                     | E-Tian (S) × Ji2731 (G)              | 209 F <sub>2</sub> , 196 F <sub>2:3</sub> , 175 F <sub>2:5</sub> | 5 (CN1, DK1, DK2, CN2, CN3)    | 374 (PAV, SSR)                               | 10 (1,430.3)                           | SMA, IM, CIM (MapQTL)               |
| Wang <i>et al.</i> (2016)                                        | Shihong137 (G) × L-Tian (S)          | 181 F <sub>7</sub>                                               | 4 (E1-4)                       | 181 (SSR)                                    | 10 (2,415.3)                           | CIM (WinQTLCart), Q × E (QTLNet)    |
| Bai <i>et al.</i> (2017)                                         | Rio (S) × BTx623 (G)                 | 189 F <sub>6-8</sub>                                             | 3 (2013-5)                     | 126 (SSR, INDEL)                             | 10 (1,418.7)                           | ICIM (IciMapping)                   |
| Disasa <i>et al.</i> (2018)                                      | Sorcoll 163 (G) × Gambella (S)       | 192 F <sub>2:3</sub>                                             | 2 (MARC, Dhera)                | 76 (SSR)                                     | 10 (2,531.3)                           | SMA, IM, ICIM (IciMapping)          |
| Brenton <i>et al.</i> (2016, 2020)                               | Diverse panel (132 S + 20 G + 238 B) | 390 lines                                                        | 3 (2013-5)                     | 232,303 (SNP)                                | -                                      | GWAS (GAPIT)                        |
| This study                                                       | Brandes (S) × Wray (S)               | 272 F <sub>2:6</sub> (map), 223 F <sub>2:6</sub> (QTL)           | 3 (T1-3)                       | 3,767 (SNP)                                  | 10 (1,368.8)                           | MIM, MT-MIM (OneQTL)                |

<sup>1</sup> S: sweet sorghum, G: grain sorghum, B: biomass sorghum; <sup>2</sup> SSR: simple sequence repeats, AFLP: amplified fragment length polymorphism, EST: expressed sequence tag, SNP: single nucleotide polymorphism, PAV: presence-absence variation, INDEL: insertion-deletion; <sup>3</sup> GWAS: genome-wide association study, SMA: single markers analysis, IM: interval mapping, CIM: composite interval mapping, Q × E: QTL by environment interaction, ICIM: inclusive CIM, MIM: multiple interval mapping, MT-MIM: multi-trait MIM

**Supplementary Table S2.** Soil analysis of the experimental areas, located at Embrapa Milho e Sorgo, Sete Lagoas, MG, Brazil. Area 1 was used for Trials 1 and 2, and Area 2 for Trial 3.

| Area                                                      | 1     |       | 2     |       |
|-----------------------------------------------------------|-------|-------|-------|-------|
|                                                           | 0-20  | 20-40 | 0-20  | 20-40 |
| Sampling depth (cm)                                       |       |       |       |       |
| pH (H <sub>2</sub> O)                                     | 4.00  | 4.90  | 6.00  | 6.10  |
| H <sup>+</sup> Al (cmol <sub>c</sub> · dm <sup>-3</sup> ) | 10.99 | 8.55  | 7.39  | 7.36  |
| O. M. (g · kg <sup>-1</sup> )                             | 4.32  | 3.84  | 5.28  | 4.63  |
| C (Total)                                                 | 2.51  | 2.23  | 3.07  | 2.69  |
| SC (cmol <sub>c</sub> · dm <sup>-3</sup> )                | 2.34  | 1.70  | 10.58 | 10.30 |
| CEC (cmol <sub>c</sub> · dm <sup>-3</sup> )               | 12.62 | 10.25 | 17.97 | 17.66 |
| V (%)                                                     | 18.55 | 16.55 | 58.88 | 58.32 |
| Al Sat. (%)                                               | 32.36 | 32.06 | 0.38  | 0.48  |

H<sup>+</sup>Al: potential acidity; O. M.: organic matter; C: organic carbon; SC: sum of cations (Ca<sup>2+</sup> + Mg<sup>2+</sup> + K<sup>+</sup>); CEC: cation exchange capacity; V: cation saturation ratio; Al Sat.: aluminum saturation indicator.

**Supplementary Table S3.** Akaike (AIC) and Bayesian (BIC) information criteria for selecting genetic variance-covariance structures  $G_L$  ( $L = 3$  trials). The smallest values are in bold and represent the most likely structure per trait according to each criterion.

| Matrix             | Description                                            | #parameters      | Criterion | FLW             | HGH             | FBY             | JUC             | BRX            | SUC            | RSU            | FIB            |
|--------------------|--------------------------------------------------------|------------------|-----------|-----------------|-----------------|-----------------|-----------------|----------------|----------------|----------------|----------------|
| ID                 | Diagonal with identical variances                      | 1                | AIC       | 13360.29        | 18405.91        | 15348.41        | 10804.37        | 8379.86        | 8324.38        | 2005.42        | 7498.52        |
|                    |                                                        |                  | BIC       | 13377.09        | 18422.70        | 15365.18        | 10821.15        | 8396.64        | 8341.15        | 2022.20        | 7515.29        |
| DIAG               | Diagonal with heterogeneous variances                  | $L = 3$          | AIC       | 13129.82        | 18393.70        | 15262.75        | 10767.95        | 8380.52        | 8326.04        | 1918.04        | 7393.47        |
|                    |                                                        |                  | BIC       | 13157.81        | 18421.69        | 15290.71        | 10795.91        | 8408.49        | 8354.00        | 1946.01        | 7421.43        |
| CS                 | Compound symmetry with identical variances             | 2                | AIC       | 13193.50        | 18193.94        | 15283.09        | 10761.62        | 8234.04        | <b>8170.12</b> | 1969.28        | 7449.13        |
|                    |                                                        |                  | BIC       | 13215.89        | 18216.32        | 15305.45        | 10783.99        | 8256.42        | <b>8192.50</b> | 1991.65        | 7471.51        |
| CS <sub>Het</sub>  | Compound symmetry with heterogeneous variances         | $L + 1 = 4$      | AIC       | 12897.62        | <b>18170.27</b> | 15188.97        | 10724.35        | <b>8233.85</b> | 8170.92        | NC             | 7331.68        |
|                    |                                                        |                  | BIC       | 12931.21        | <b>18203.85</b> | 15222.52        | 10757.90        | <b>8267.41</b> | 8204.48        | NC             | 7365.23        |
| AR1                | First-order autoregressive with identical variances    | 2                | AIC       | 13179.60        | 18206.80        | 15266.22        | 10760.11        | 8247.86        | 8180.86        | 1971.80        | 7443.29        |
|                    |                                                        |                  | BIC       | 13201.99        | 18229.18        | 15288.58        | 10782.48        | 8270.23        | 8203.23        | 1994.17        | 7465.67        |
| AR1 <sub>Het</sub> | First-order autoregressive with heterogenous variances | $L + 1 = 4$      | AIC       | 12899.61        | 18179.41        | 15180.77        | 10719.39        | 8246.78        | 8180.39        | NC             | <b>7326.68</b> |
|                    |                                                        |                  | BIC       | 12933.19        | 18212.99        | 15214.32        | <b>10752.94</b> | 8280.34        | 8213.95        | NC             | <b>7360.24</b> |
| UNST               | Unstructured                                           | $L(L + 1)/2 = 6$ | AIC       | <b>12868.72</b> | 18173.50        | <b>15161.20</b> | <b>10717.16</b> | 8234.93        | 8174.64        | <b>1876.25</b> | 7327.04        |
|                    |                                                        |                  | BIC       | <b>12913.50</b> | 18218.27        | <b>15205.93</b> | 10761.90        | 8279.68        | 8219.38        | <b>1921.00</b> | 7371.78        |

Traits: days to flowering (FLW), plant height (HGH, in cm), fresh biomass yield (FBY, in  $t \cdot ha^{-1}$ ), juice extraction yield (JUC, in %), total soluble solids (BRX, in °Brix), sucrose content (SUC, in %), reducing sugar content (RSU, in %) and fibers (FIB, in %). NC = model did not converge.

**Supplementary Table S4.** Summary of raw data, physical map (imputed and filtered markers), and genetic maps from GBS-derived markers relative to the *Sorghum bicolor* chromosomes (v2.1).

| Chromosome | Number of markers |              |             | Genetic map |                   |
|------------|-------------------|--------------|-------------|-------------|-------------------|
|            | Raw               | Physical map | Genetic map | Length (cM) | Density (SNPs/cM) |
| 1          | 71,878            | 8,109        | 594         | 207.67      | 2.86              |
| 2          | 59,518            | 9,489        | 512         | 181.19      | 2.83              |
| 3          | 59,958            | 8,382        | 414         | 111.88      | 3.70              |
| 4          | 51,905            | 7,206        | 396         | 145.88      | 2.71              |
| 5          | 33,491            | 5,826        | 308         | 128.00      | 2.41              |
| 6          | 40,664            | 6,975        | 364         | 123.03      | 2.96              |
| 7          | 33,905            | 4,893        | 327         | 132.16      | 2.47              |
| 8          | 31,969            | 2,790        | 212         | 102.28      | 2.07              |
| 9          | 38,524            | 5,964        | 330         | 120.77      | 2.73              |
| 10         | 39,429            | 6,373        | 310         | 115.97      | 2.67              |
| Total      | 461,241           | 66,007       | 3,767       | 1,368.83    | 2.75              |
