# Supplementary material
Source: publisher figshare collection journal article supplement (https://gsajournals.figshare.com/articles/dataset/_/15183750)
Supplement: Supplementary file 2 [file 1]

Genetic Map

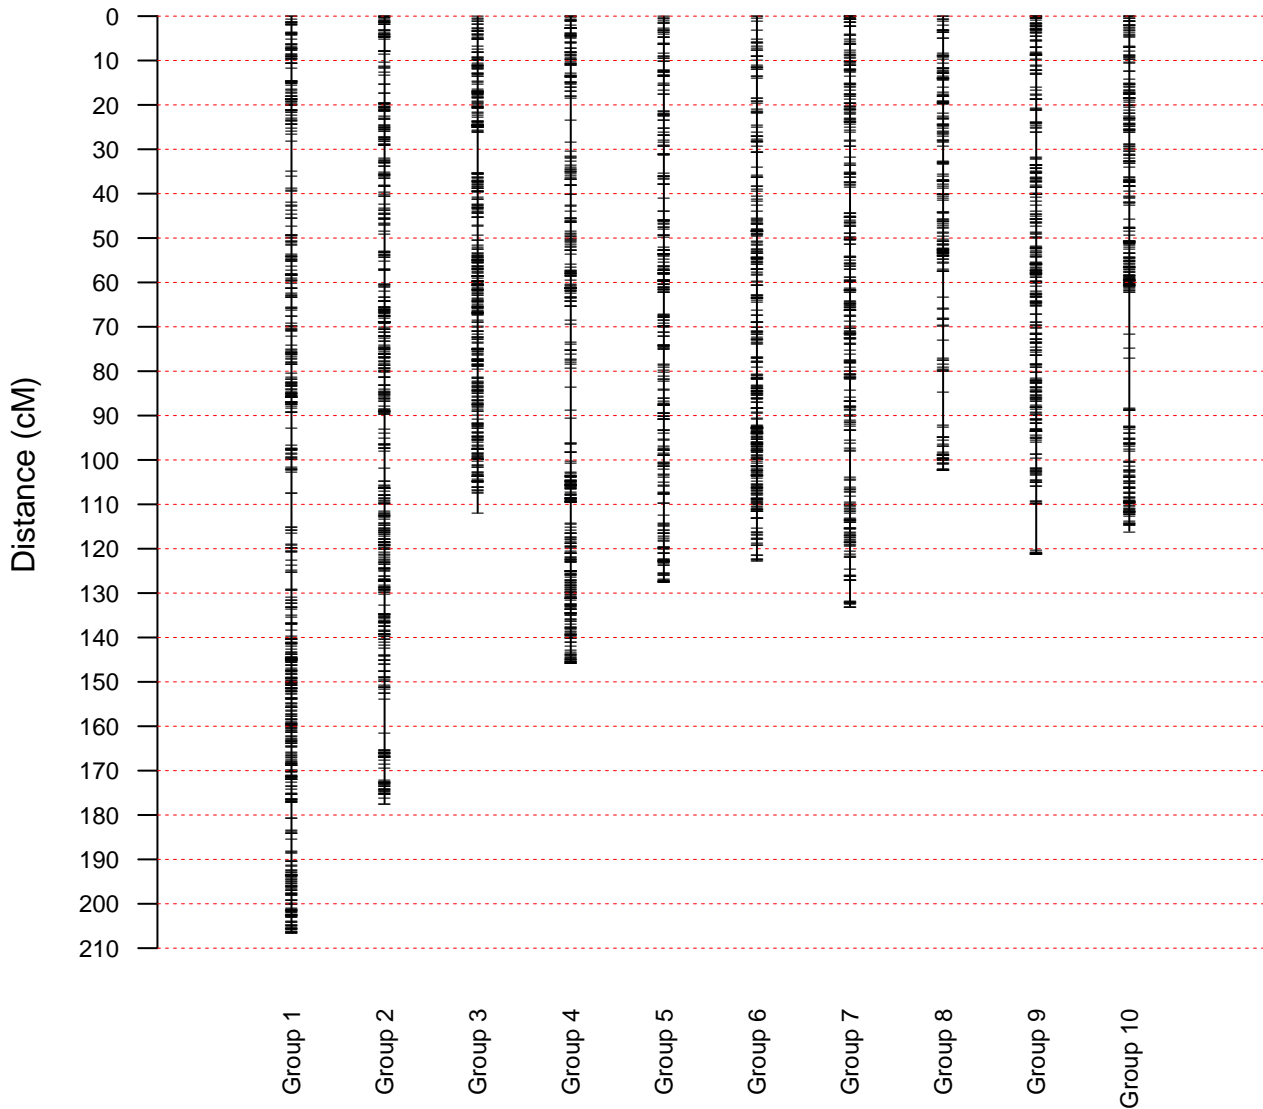

LG1

0.1 0.2 0.4 0.9 1.9 4 8.4 17.6 36.8 77.1

LOD

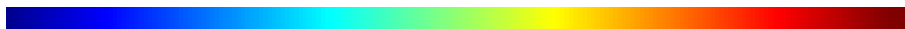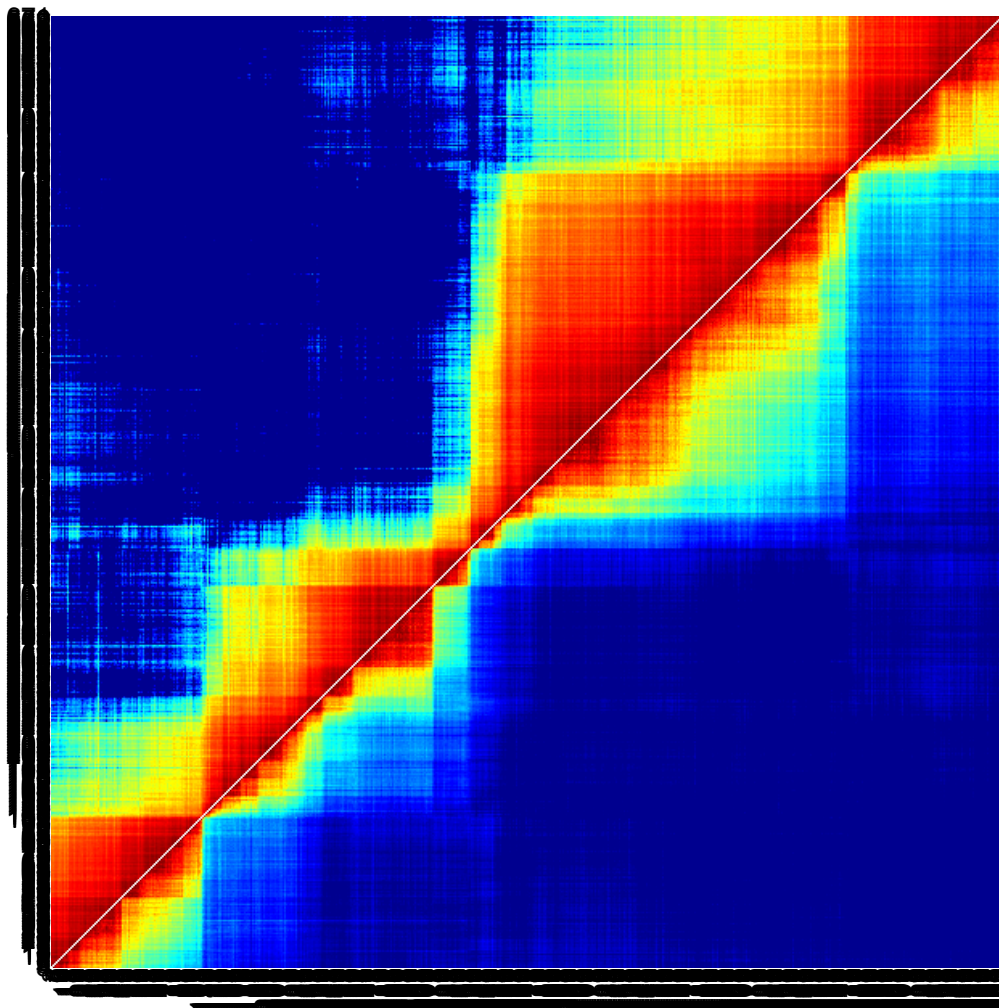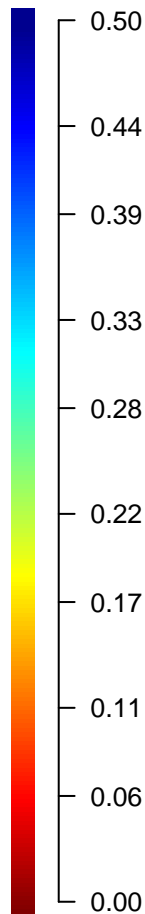

rec. frac.

LG2

0.1 0.2 0.4 0.9 1.9 4 8.3 17.4 36.4 76.2

LOD

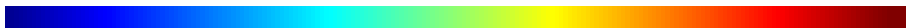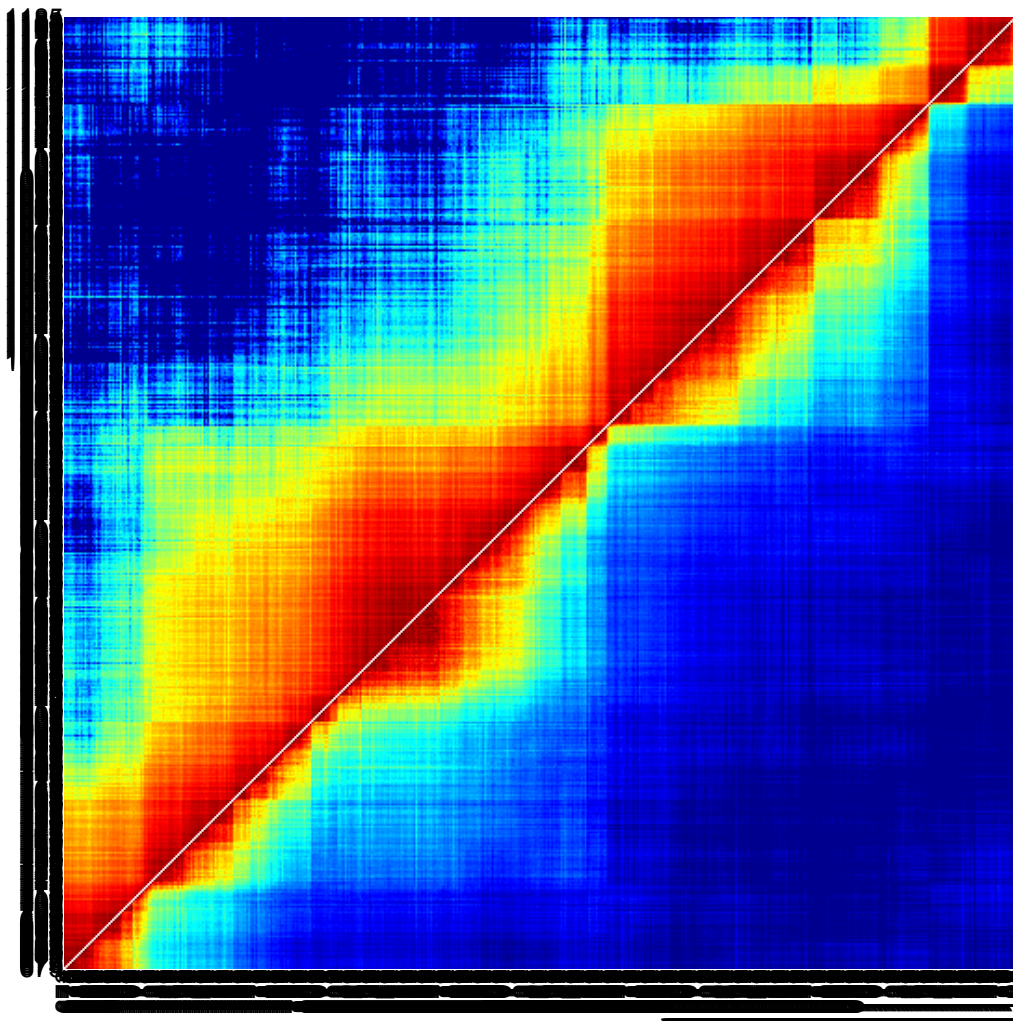

rec. frac.

LG3

0.1 0.2 0.4 0.9 1.9 4 8.4 17.5 36.7 76.8

LOD

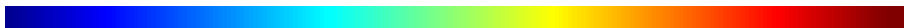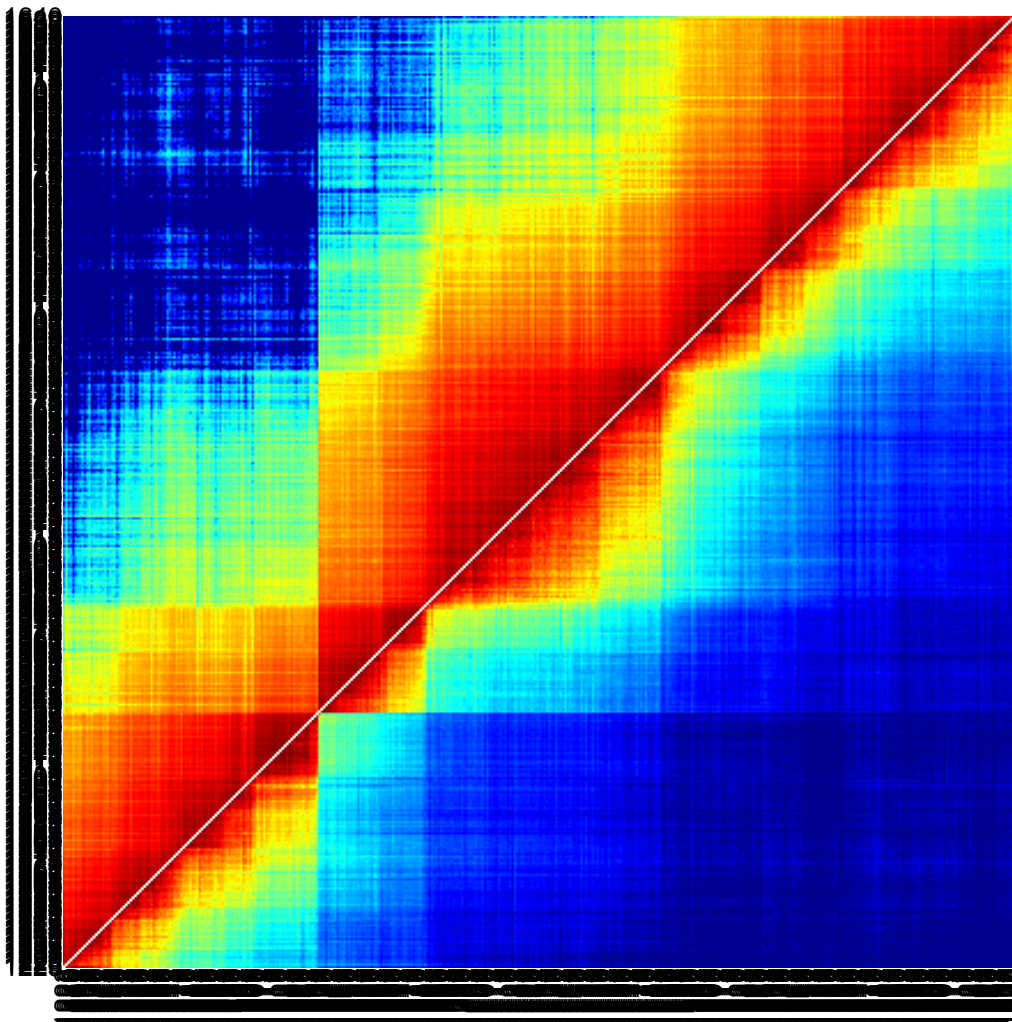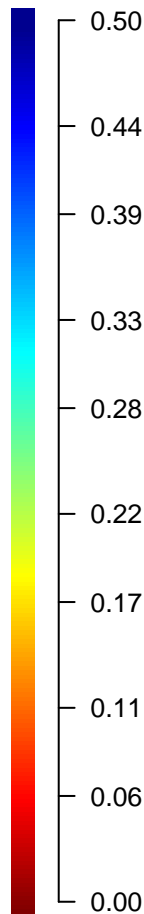

rec. frac.



LG4

0.1 0.2 0.4 0.9 1.9 4 8.4 17.5 36.7 76.8

LOD

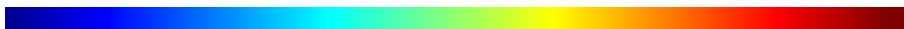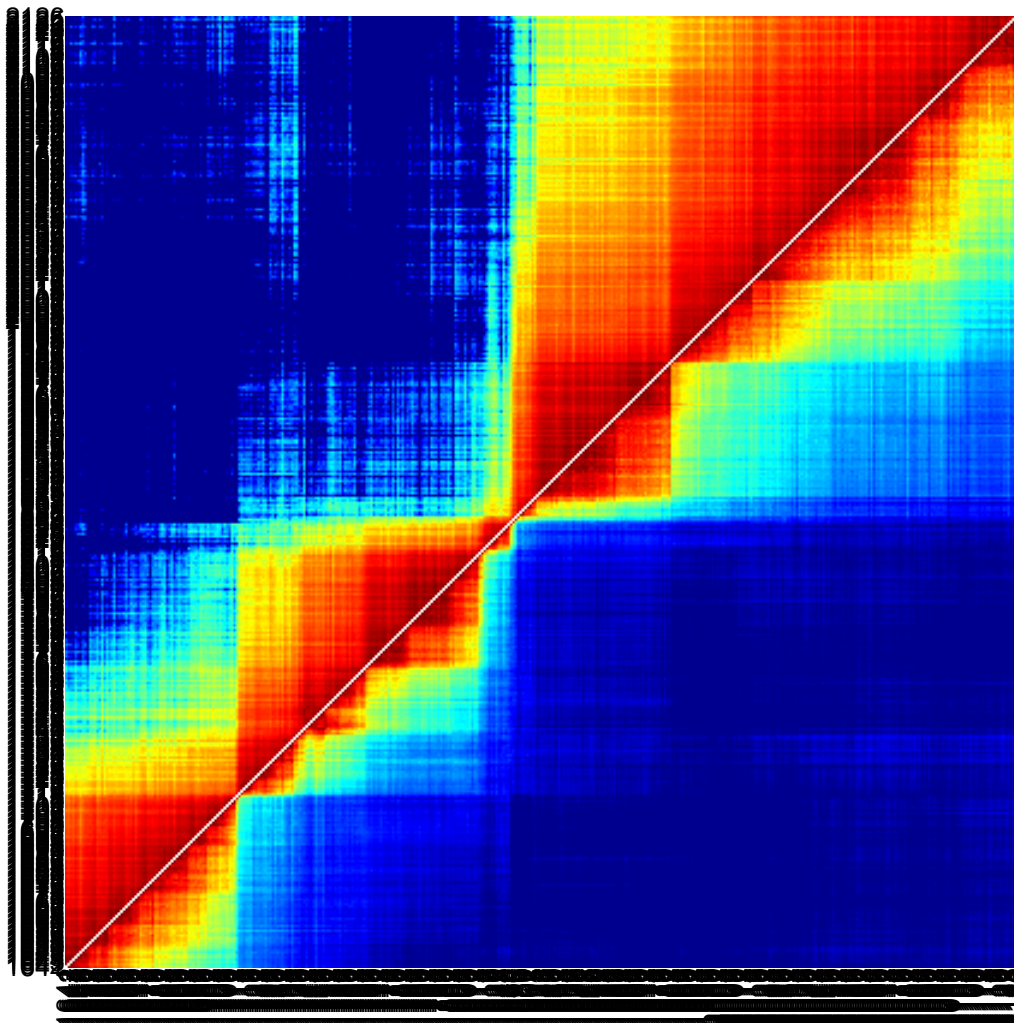

rec. frac.

LG5

0.1 0.2 0.4 0.9 1.9 4 8.3 17.4 36.3 75.9

LOD

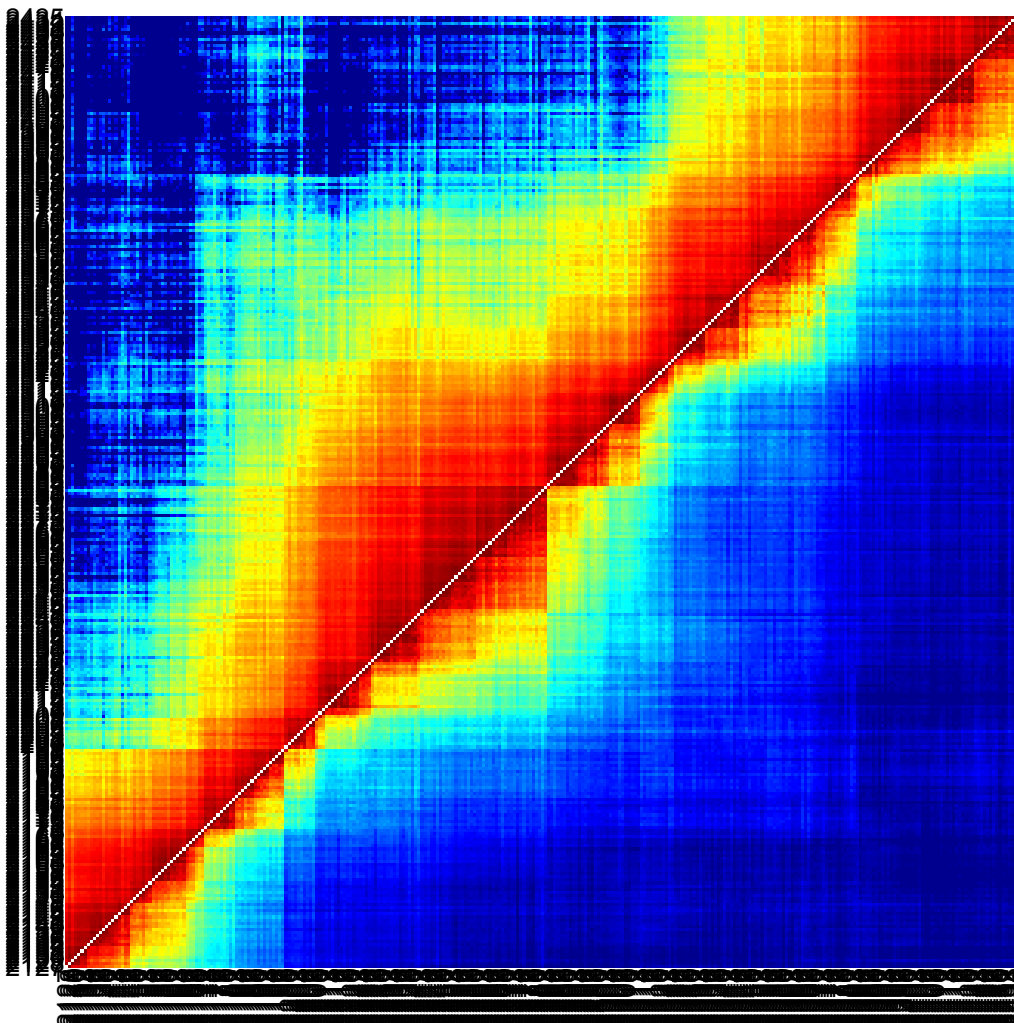

rec. frac.

LG6

0.1 0.2 0.4 0.9 1.9 4 8.4 17.5 36.6 76.5

LOD

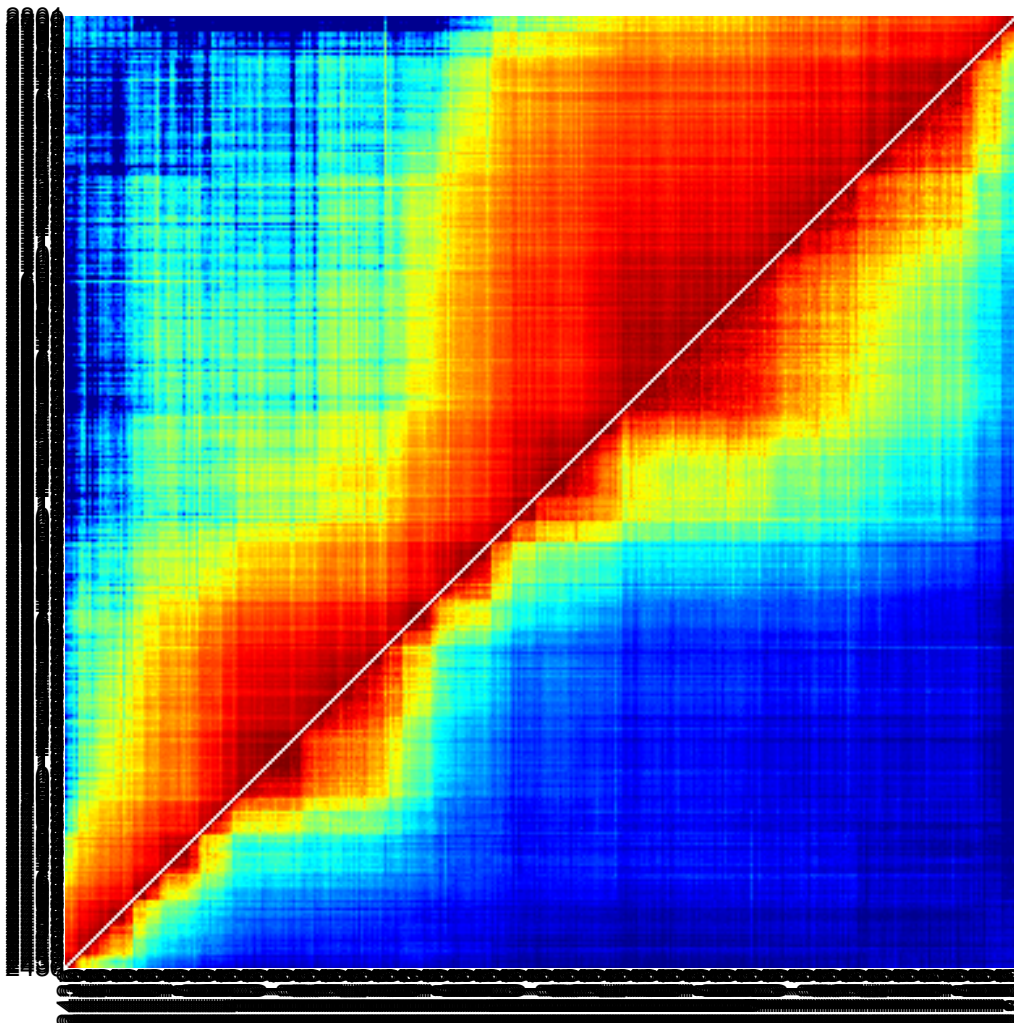

rec. frac.

LG7

0.1 0.2 0.4 0.9 1.9 4 8.3 17.3 36.2 75.6

LOD

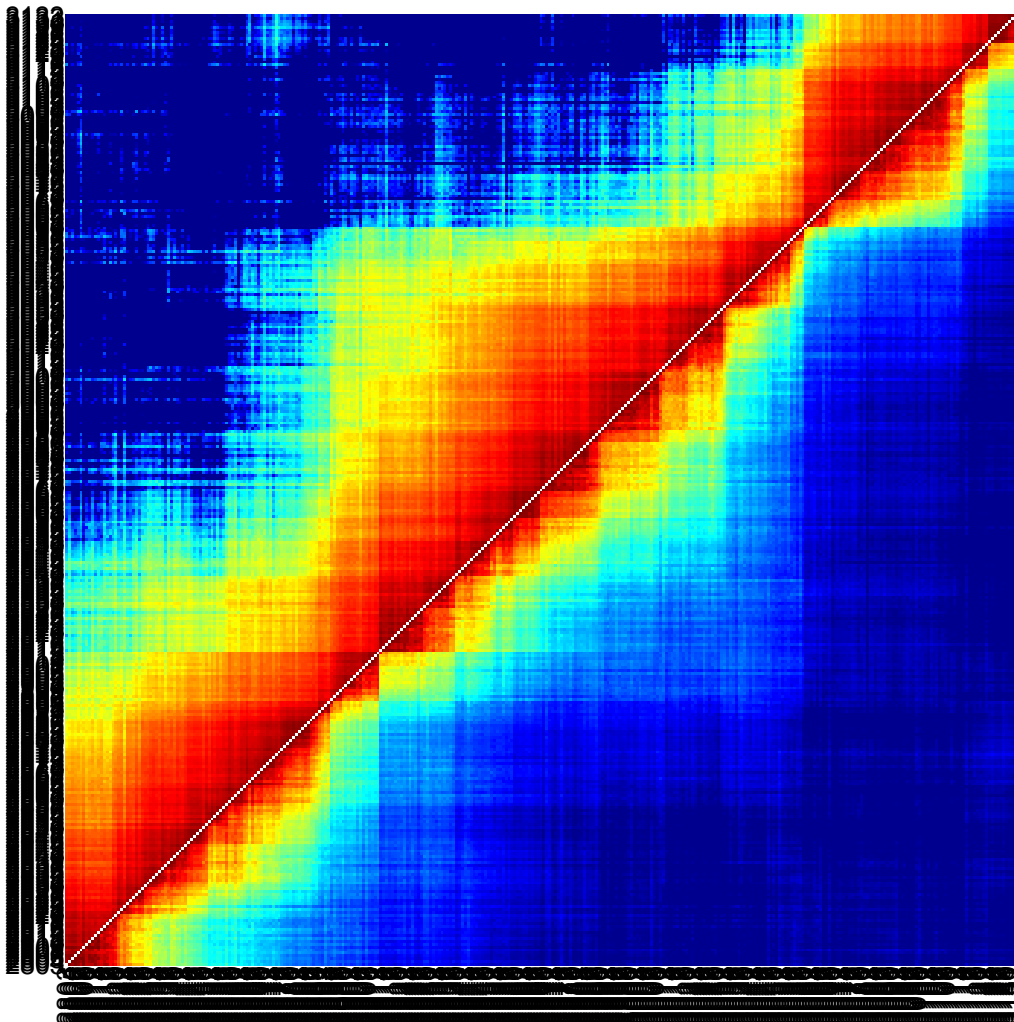

rec. frac.



LG8

0.1 0.2 0.4 0.9 1.9 3.9 8.2 17.1 35.5 74.1

LOD

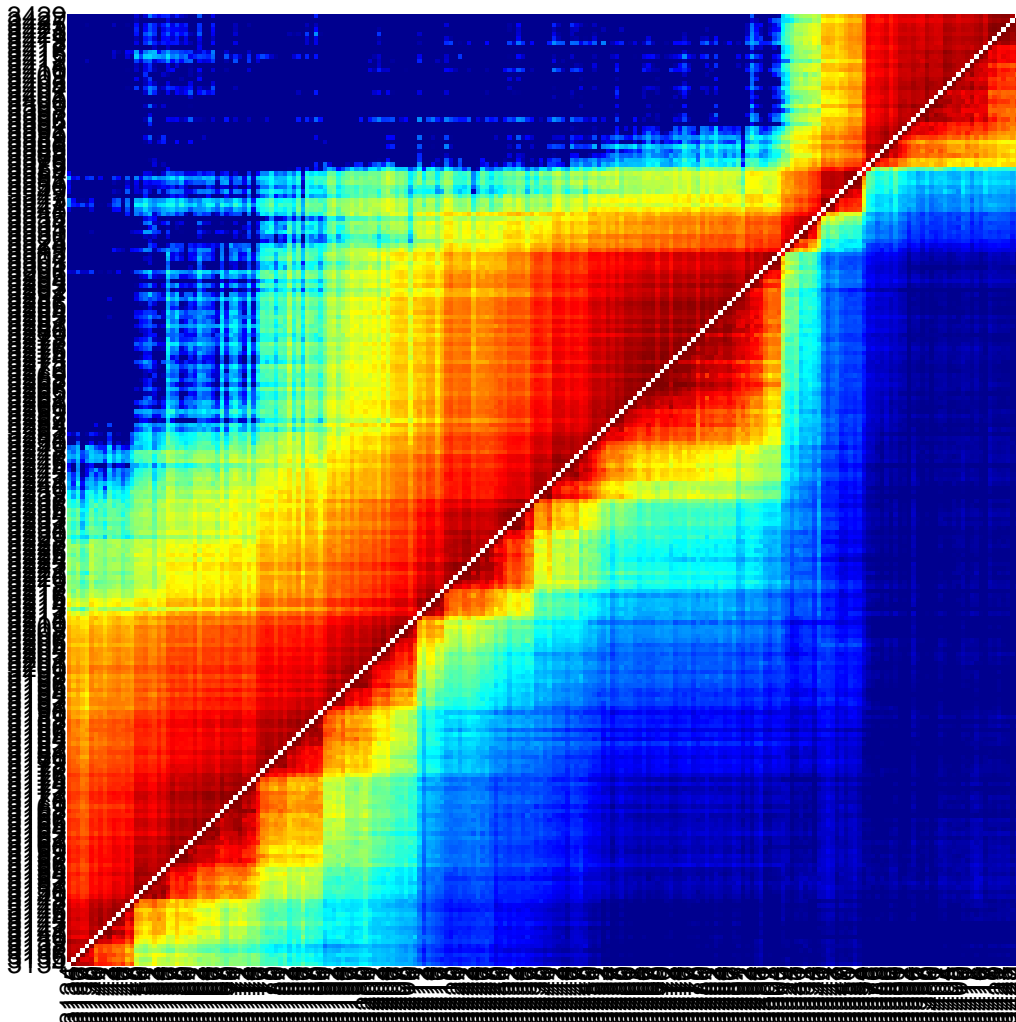

rec. frac.

LG9

0.1 0.2 0.4 0.9 1.9 4 8.3 17.2 35.9 75

LOD

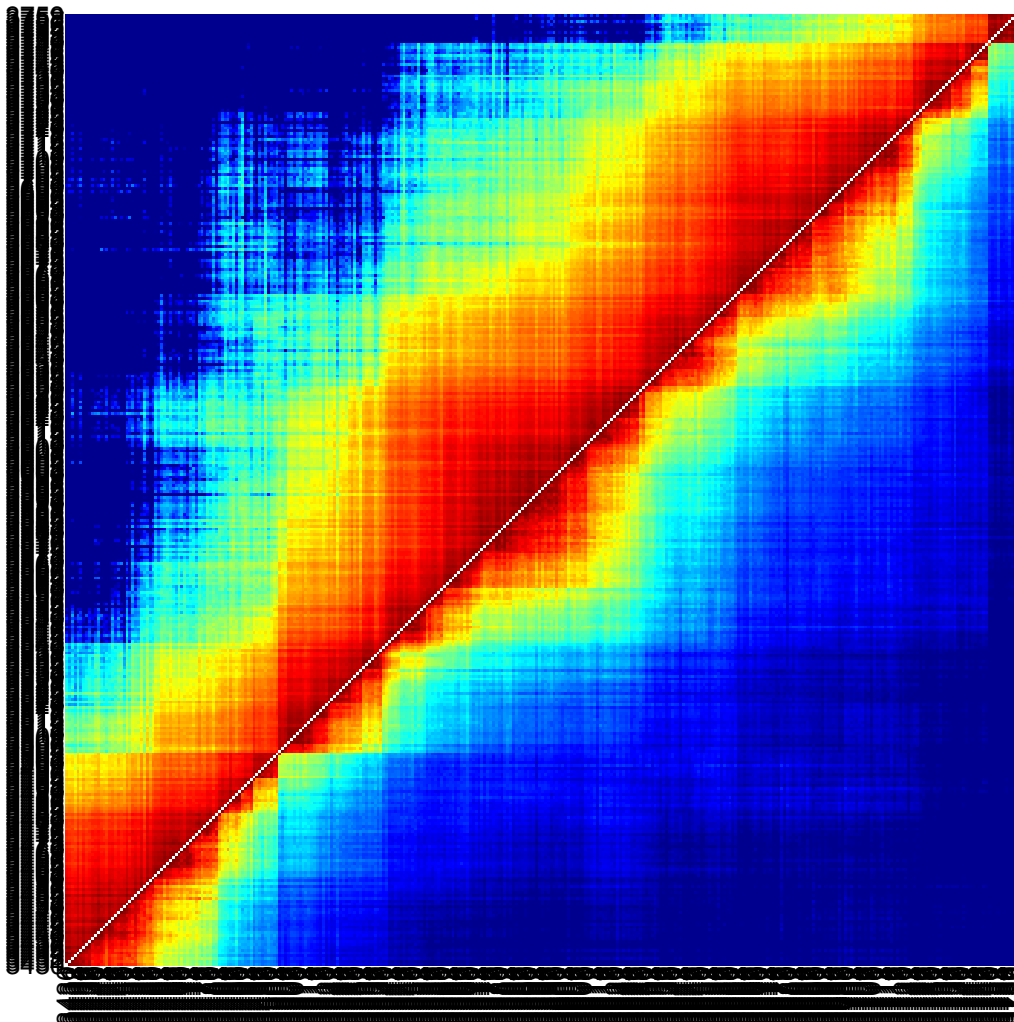

rec. frac.

LG10

0.1 0.2 0.4 0.9 1.9 4 8.3 17.3 36.1 75.3

LOD

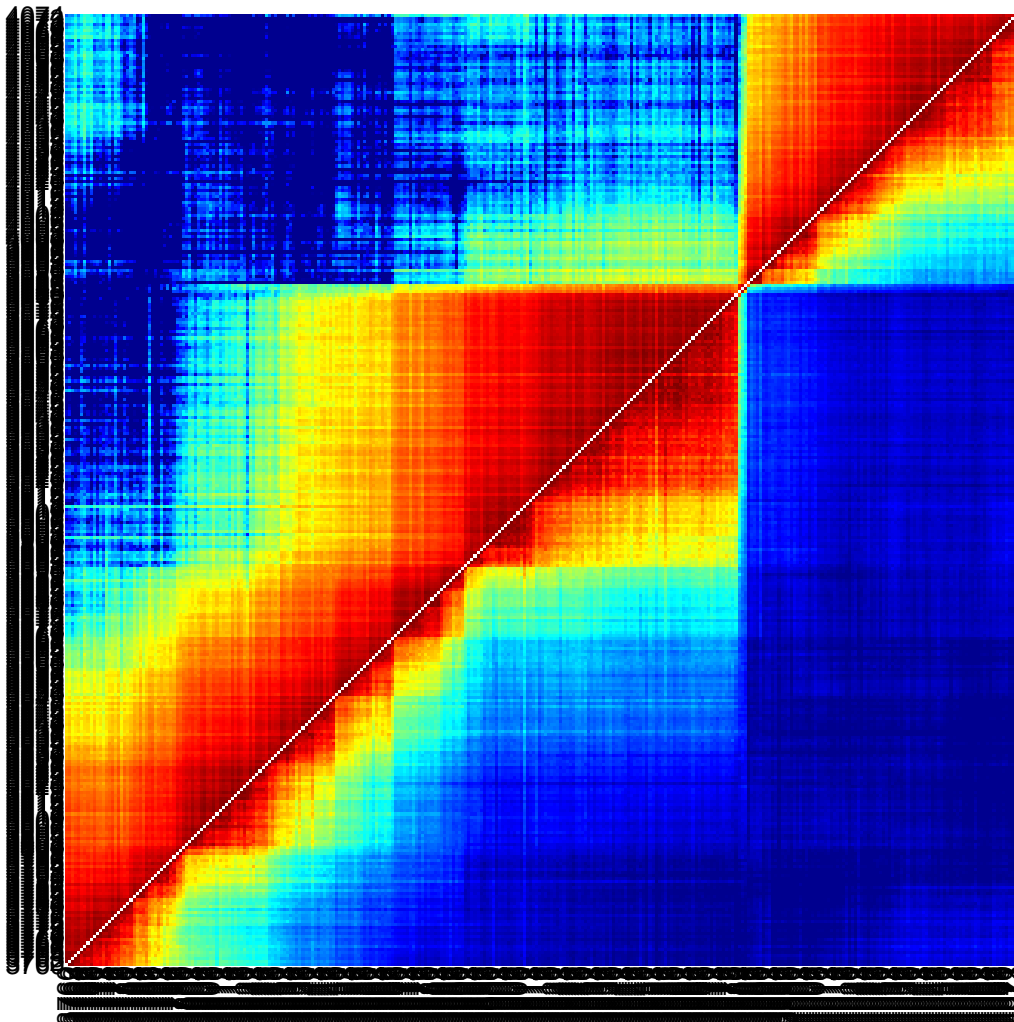

rec. frac.
